# Supplementary material for: Putative molecular markers of Plasmodium falciparum resistance to antimalarial drugs in malaria parasites from Ghana
Source: PubMed Central journal article supplement (PMC10910922; doi:10.3389/fepid.2024.1279835), 2024-02-15
Supplement: Datasheet1.pdf [file Datasheet1.pdf]

## 1 Supplementary Tables and Figure

**Supplementary Table 1 Primer sequences, PCR conditions used for the amplification of the genes**

| <b>Gene</b>      | <b>Primer sequences '5-3'</b>                                        | <b>Amplicon size (bp)</b> | <b>PCR cycling conditions</b>                                                                  | <b>Reference</b>             |
|------------------|----------------------------------------------------------------------|---------------------------|------------------------------------------------------------------------------------------------|------------------------------|
| <i>pffp2</i>     | 1°<br>F: TGTAGCAAGAACGTTTTGTGTAAAT<br>R:GGTAAAGGAAAAATTAGTAAGGATGC   | 2029                      | 94°C for 5 mins; 35 cycles of (94°C for 30s, 60°C for 60s, 68°C for 90s); 68°C for 10mins      | <b>(Conrad et al., 2014)</b> |
|                  | 2°<br>F:TGTGTAAATTAAGATAAAAAGTGCAAA<br>R: GGTCCCTTTTTAAAATACTATTGACA | 1450                      | 94°C for 5 mins; 35 cycles of (94°C for 30s, 60°C for 60s, 68°C for 90s); 68°C for 10mins      |                              |
| <i>pfarps10</i>  | F: CACAATATTATGTTTCATTTTAG<br>R: GTATAATTTATTCTGCTTACATTC            | 165                       | 95°C for 5 mins; 40 cycles of (95°C for 30s, 56°C for 45s, 68°C for 30s);72°C for 7mins        | <b>(Wamae et al., 2019)</b>  |
| <i>pffd</i>      | F: GATGCTAGTGAAAGACAGAAT G<br>R: CAC ATA TTT TTG ATT GAG GAC         | 194                       | 95°C for 5 mins; 40 cycles of (95°C for 30s, 56°C for 45 sec, 68°C for 30 sec); 72°C for 7 min | <b>(Wamae et al., 2019)</b>  |
| <i>pfdhfr</i>    | F: TCCTTTTTATGATGGAACAAG<br>R: AGTATATAC ATCCTAACAGA                 | 700                       | 95°C for 3 mins; 45 cycles (92°C for 30s, 45°C for 45s, 68°C for 45s); 68°C for 3mins          |                              |
| <i>pfdhps</i>    | 1°<br>F: AACCTAAACGTGCTGCTGTTCAA<br>R: AATTGTGTGATTTGTCCACAA         | 711                       | 95°C for 5 mins, 35 cycles of (95°C for 30s, 50°C for 30s, 68°C for 1 min); 68°C for 5 mins    | <b>(Oguike et al., 2016)</b> |
|                  | 2°<br>F: ATGATAAATGAAGGTGCTAG<br>R: TCATTTTGT TGTTCAATCA TGT         | 647                       | 95°C for 5 mins, 35 cycles (95°C for 30s, 52°C for 30s, 68°C for 1 min); 68°C for 5 mins       |                              |
| <i>pfcoronin</i> | F: ATGTATAATGTTTCCTTTAATCAAGA<br>R: CTTTGGCATATTTATTTCAAAGG          |                           | 95°C for 5 mins, 40 cycles of (95°C for 30s, 56°C for 45s, 68°C for 30s); 72°C for 7 mins      | <b>(Demas et al., 2018)</b>  |

|               |                                                                  |      |                                                                                                                                                                                                                                       |                                 |
|---------------|------------------------------------------------------------------|------|---------------------------------------------------------------------------------------------------------------------------------------------------------------------------------------------------------------------------------------|---------------------------------|
| <i>pfafs</i>  | F: CTTCAATTTTGTAATGAAATTTCTTC<br>R: CATATTATGTCCATATAAACTTTGGA   |      | 95°C for 5 mins, 40 cycles of (95°C for 30s, 56°C for 45s, 68°C for 30s); 72°C for 7 mins                                                                                                                                             | <b>(Wamae et al., 2019)</b>     |
| <i>pfmrp1</i> | 1°<br>F: AATATTCCATTCAATGAAAATTAC<br>R: CAACGTACTTTTATTCATTGAGA  | 208  | 95°C for 9 min, 45 cycles of (95°C for 40s, 50°C for 40s, 72°C for 40s); 72°C for 5 mins                                                                                                                                              | <b>(Dahlstrom et al., 2009)</b> |
|               | 2°<br>F: TATTCCATTCAATGAAAATTACCT<br>R: TATGGAAGGATCTAAAGATGTAAA | 109  | 95°C for 9 mins, 45 cycles of (95°C for 40s, 50°C for 40s, 72°C for 40s); 72°C for 5 mins                                                                                                                                             |                                 |
| <i>pfmrp2</i> | 1°<br>F: ACAAGAATAAGTAATATGCATCATA<br>R: TAGATTCATCATACTTATTTCCG | 1171 | 94°C for 2 min; 10 cycles of (93°C for 15s, 57°C for 30s, 72°C for 90s); 25 cycles of (93°C for 15s, 55°C for 30s, 72°C for 90s);<br>10 cycles of (93°C for 15s, 53°C for 30s, 72°C for 90s); 72°C for 10 min                         | <b>(Veiga et al., 2014)</b>     |
|               | 2°<br>F: TGGGAATCTATAGCTTTTGAT<br>R: TGTGGTACATATAAAATAGGCA      | 1049 | 94°C for 2 min; 10 cycles of (93°C for 15 sec, 57°C for 30 sec, 72°C for 90 sec); 25 cycles of (93°C for 15 sec, 55°C for 30 sec, 72°C for 90 sec); 10 cycles of (93°C for 15 sec, 53°C for 30 sec, 72°C for 90 sec); 72°C for 10 min |                                 |

**Supplementary Table 2 Observed *pffp2* mutations in all the Ghanaian isolates analyzed.**

| Mutation | FZ | GS | CS | Mutation | FZ | GS | CS | Mutation | FZ | GS | CS |
|----------|----|----|----|----------|----|----|----|----------|----|----|----|
| Y3D      | -  | -  | 1  | K89S     | -  | -  | 1  | E160A    | 1  | -  | -  |
| Y3N      | -  | 1  | -  | K90I     | -  | 1  | -  | E160K    | 1  | -  | -  |
| N4H      | 2  | -  | 3  | K90N     | 1  | 1  | 3  | H161N    | 1  | -  | -  |
| M5R      | 1  | 8  | 5  | F91I     | 1  | -  | -  | H161R    | 1  | -  | -  |
| M5I      | -  | 1  | -  | I92N     | -  | -  | 2  | H161Y    | 2  | -  | -  |
| M5L      | -  | -  | 1  | I92V     | 1  | -  | -  | I162K    | 1  | -  | -  |
| M5V      | -  | 1  | -  | V93A     | -  | 8  | 5  | I162L    | -  | 1  | -  |
| D6N      | -  | 1  | -  | V93L     | -  | -  | 1  | I162T    | 1  | -  | -  |
| D6V      | -  | 1  | -  | S94A     | -  | -  | 1  | N163T    | 3  | 1  | 1  |
| D6Y      | -  | 2  | -  | S94P     | -  | 4  | 2  | Q164H    | 1  | -  | 2  |
| Y7Y      | -  | 5  | 1  | S94S     | -  | -  | 2  | Q164L    | 1  | -  | -  |
| Y7*      | 11 | 3  | 4  | K95E     | 1  | 2  | -  | Q164P    | 1  | 1  | -  |
| Y7H      | -  | -  | 1  | I96I     | -  | 1  | -  | F165L    | -  | 1  | -  |
| A8A      | 9  | 32 | 18 | I96M     | -  | 1  | 1  | Y166*    | 1  | 2  | 2  |
| A8I      | 2  | -  | -  | I96N     | -  | 1  | -  | Y166N    | 1  | -  | -  |
| P9P      | 1  | -  | -  | I96S     | -  | 1  | -  | Y166L    | 1  | -  | -  |
| H10N     | 3  | 1  | -  | D97A     | -  | 1  | -  | M167I    | 1  | -  | 1  |
| H10P     | 1  | -  | 3  | D97E     | 1  | 4  | 2  | M167R    | 8  | 2  | 2  |
| H10Q     | 1  | 1  | 3  | D97G     | -  | -  | 2  | M167T    | 1  | -  | 1  |
| H10R     | -  | 1  | -  | E98D     | -  | 1  | -  | I169I    | 9  | 1  | -  |
| E11E     | 3  | -  | 1  | E98E     | -  | 1  | -  | K170K    | 1  | -  | -  |
| E11K     | -  | 2  | -  | E98G     | -  | 1  | -  | K170N    | 1  | -  | -  |
| E11G     | -  | -  | 1  | E98K     | -  | -  | 1  | T171P    | 1  | 1  | -  |
| V12I     | -  | 3  | -  | E98Q     | -  | -  | 1  | T171T    | 1  | 1  | -  |
| V12E     | -  | -  | 1  | A99P     | -  | 1  | 1  | N172I    | -  | 1  | -  |
| V12G     | -  | 1  | -  | L100I    | -  | 1  | -  | N172K    | 24 | 3  | 1  |
| V12Q     | -  | -  | 1  | L100L    | -  | -  | 2  | N172Q    | 1  | -  | -  |
| I13F     | 2  | 2- | 11 | S101*    | -  | 1  | -  | N173I    | 1  | -  | -  |
| S14S     | 1  | 7  | 7  | S101P    | -  | -  | 1  | N173K    | 21 | 4  | 3  |
| S14F     | 2  | 4  | 1  | S101S    | 1  | 1  | 1  | N173T    | 1  | -  | -  |
| Q15H     | 8  | 7  | 3  | S101T    | -  | -  | 3  | K174N    | -  | 1  | -  |
| Q15P     | -  | -  | 3  | F102H    | -  | -  | 1  | K174R    | -  | -  | 1  |
| Q16K     | -  | 2  | -  | F102L    | -  | 3  | -  | Q175P    | -  | 1  | -  |
| Q16Q     | 1  | 6  | 2  | F102S    | 1  | -  | -  | Q175L    | 1  | -  | -  |
| Q16R     | -  | 1  | 1  | Y103*    | -  | 1  | 1  | Q175Q    | 1  | -  | -  |
| E18*     | -  | 2  | -  | Y103F    | -  | 1  | -  | Y176*    | 3  | -  | -  |
| E18G     | -  | 1  | -  | Y103H    | -  | -  | 1  | Y176K    | 1  | -  | -  |
| E18K     | 3  | 15 | 8  | Y103R    | -  | -  | 1  | Y176N    | 1  | -  | -  |
| R19H     | -  | 1  | -  | Y103S    | -  | 1  | -  | N177I    | 14 | -  | 1  |

|      |    |    |    |       |   |   |   |       |    |   |   |
|------|----|----|----|-------|---|---|---|-------|----|---|---|
| R19I | -  | 2  | -  | Y103Y | 1 | - | - | N177T | -  | - | 1 |
| R19K | 2  | 8  | 7  | D104D | - | 1 | 1 | S178P | -  | 1 | - |
| R19R | -  | 1  | -  | D104E | 6 | 4 | 1 | S178S | 2  | - | - |
| V21F | -  | 2  | 4  | D104G | - | 1 | - | P179P | 3  | 4 | 8 |
| V21G | -  | 1  | 1  | S105N | 3 | 2 | 9 | E181D | -  | - | 1 |
| V21I | -  | -  | 1  | S105R | 5 | 1 | - | E181E | 1  | - | - |
| V21V | 1- | 25 | 9  | S105S | 1 | - | - | M182R | 1  | - | - |
| D22E | -  | 1  | 1  | K106* | - | 1 | - | K183E | 2  | - | - |
| D22G | 1  | -  | -  | K106K | 1 | - | - | K183R | -  | - | 1 |
| K23Q | -  | -  | 1  | K106I | 1 | - | - | E184D | 1  | - | - |
| Y24N | -  | 1  | -  | K106R | - | - | 1 | E184E | -  | 2 | 1 |
| V25F | 1  | 7  | 5  | K107K | - | 1 | - | E184G | 2  | - | - |
| V25G | -  | 1  | -  | K107M | 4 | 1 | 6 | R185K | 2  | 1 | - |
| V25V | -  | 3  | 1  | N108K | 7 | 1 | 6 | Q187R | 1  | - | - |
| D26E | -  | 6  | 3  | N108M | - | 3 | - | V188V | 2  | - | - |
| D26Y | -  | -  | 1  | N108N | - | - | 1 | F189L | 1  | - | - |
| R27F | -  | 1  | -  | N108R | 1 | - | - | L190* | 1  | - | - |
| R27I | -  | 2  | -  | N108S | 6 | 1 | 1 | L190F | 1  | - | - |
| R27K | 4  | 1- | 13 | D109A | 1 | 2 | 2 | N192K | 1  | - | - |
| I29F | 1  | 7  | -  | D109D | 5 | 1 | 6 | A193A | 6  | 3 | 2 |
| L30F | -  | 2  | -  | D109G | 2 | 3 | - | A193G | -  | 1 | - |
| K31K | 34 | 63 | 31 | D109V | 3 | - | - | A193P | 1  | - | - |
| K31* | -  | 1  | -  | I110* | 1 | - | - | P194H | 3  | 3 | 3 |
| N32K | 6  | 28 | 24 | I110K | 3 | - | - | K195K | 4  | 1 | 2 |
| K33Y | -  | 1  | -  | I110L | 3 | 6 | 3 | K195Q | 1  | - | - |
| K33R | -  | -  | 1  | I110M | 1 | - | - | V196E | 1  | - | - |
| S35L | -  | 4  | -  | I110Q | 1 | - | - | V196G | -  | - | 1 |
| S35N | -  | 1  | -  | N111D | 1 | - | - | N197Y | -  | - | 1 |
| S35P | -  | -  | 1  | N111H | 2 | - | 1 | M198L | 6  | - | 1 |
| S35S | 1  | 12 | 6  | N111I | - | 3 | - | M198V | 1  | - | 1 |
| S35T | -  | 2  | -  | N111Y | 7 | 1 | 1 | H199H | 1  | - | - |
| L36L | -  | -  | -  | K112* | 1 | 3 | - | H199L | 14 | 2 | 5 |
| L37* | 2  | 7  | 5  | K112A | - | - | 1 | H199Q | 2  | 1 | - |
| L37V | -  | 1  | 1  | K112E | 1 | 2 | 1 | H199R | -  | - | 1 |
| V38D | -  | 1  | -  | K112I | 3 | - | - | N200T | 8  | - | - |
| V38F | -  | 1  | 1  | K112N | 1 | - | 2 | N201H | 1  | - | - |
| V38G | -  | 1  | -  | K112Q | 1 | - | - | N201I | 3  | 1 | - |
| V38Y | -  | -  | 1  | K112T | 2 | - | 1 | N201K | 3  | 2 | - |
| I39I | 1  | 3  | 1  | K112Y | 1 | - | 1 | N201S | 1  | - | - |
| I39N | -  | -  | 1  | Y113C | - | - | 1 | N202D | -  | - | 1 |
| S41L | -  | 1  | -  | Y113F | - | 1 | - | N202K | 5  | 1 | - |
| S41P | 1  | -  | -  | Y113N | 3 | - | 5 | N202Y | -  | - | 1 |
| S41S | 1  | 4  | 1  | N114D | 3 | 1 | 3 | K203K | -  | 1 | - |

|      |    |    |    |       |    |   |   |       |    |    |   |
|------|----|----|----|-------|----|---|---|-------|----|----|---|
| L42F | -  | -  | 1  | N114E | -  | 1 | - | N204K | 2  | 1  | - |
| L42L | -  | 1  | -  | N114F | 1  | - | - | S205G | -  | 1  | - |
| S43F | -  | -  | 1  | N114G | 1  | 1 | - | S205I | 1  | -  | - |
| S43P | -  | 1  | -  | N114H | 11 | 8 | 5 | Y207* | 1  | -  | 1 |
| S43S | 8  | 19 | 7  | N114N | 4  | - | 5 | Y207F | 7  | -  | - |
| S43T | -  | -  | 1  | N114P | 2  | - | - | K209K | 2  | 1  | - |
| V44G | -  | 1  | 1  | N114R | 1  | - | - | E210D | 2  | 2  | - |
| V44V | 1  | 2  | 1  | N114T | 5  | 3 | 1 | E210G | 5  | -  | - |
| L45P | -  | -  | 1  | N114Y | 1  | - | - | E210N | 1  | -  | 1 |
| S46S | 2  | 2  | 4  | E115A | 1  | - | - | N212Y | 1  | -  | - |
| V47E | -  | 2  | 1  | E115D | 1  | - | - | R213G | 1  | -  | - |
| V47F | -  | -  | 1  | E115E | 2  | - | - | R213K | 1  | -  | - |
| V47I | -  | -  | 2  | E115G | 2  | 1 | 1 | R213R | 1  | -  | - |
| V47V | 27 | 78 | 28 | G116G | 5  | 2 | 3 | T218S | 1  | -  | - |
| V48C | -  | 1  | -  | G116R | -  | - | 1 | Y219N | 1  | -  | - |
| V48F | -  | -  | 1  | N117D | 5  | 6 | 3 | Y219Y | 1  | -  | - |
| V48G | -  | 2  | -  | N117H | 3  | 2 | 2 | H220H | 2  | -  | - |
| V48V | 2  | 6  | 1  | N117K | -  | 1 | - | H220L | 1  | -  | - |
| G49G | 1  | 5  | -  | N117L | -  | - | 1 | H220P | 1  | -  | - |
| F50L | 1  | 2  | -  | N117Y | 4  | 2 | - | H220Q | 5  | 14 | 5 |
| V51F | 1  | 4  | 1  | N118N | 3  | - | 5 | E221D | 3  | -  | - |
| V51I | 29 | 72 | 27 | N118T | 3  | 2 | 3 | E221E | 1  | -  | - |
| L52* | -  | 1  | -  | N119D | 3  | - | - | E221G | 27 | 6  | 4 |
| L52F | -  | 2  | -  | N119H | 3  | 2 | 1 | K223* | 2  | 1  | - |
| F53S | -  | 1  | -  | N119T | 5  | 3 | 2 | N224T | 1  | 1  | - |
| Y54F | -  | 2  | -  | N119Y | -  | - | 1 | K225Q | -  | 1  | - |
| Y54I | -  | 1  | -  | N120H | 2  | 2 | - | Y226I | 1  | -  | - |
| Y54N | -  | 1  | 1  | N120I | 1  | - | 1 | L227F | 1  | -  | - |
| F55F | -  | 2  | 1  | N120K | 1  | - | - | L227L | 8  | 2  | - |
| F55L | -  | 1  | -  | N120T | 1  | - | - | S228I | 2  | -  | - |
| T56A | -  | 1  | -  | N120Y | 2  | 1 | 5 | S228N | 2  | -  | - |
| T56F | -  | 1  | -  | N121G | 1  | 1 | - | S228S | 1  | -  | - |
| T56P | 1  | -  | -  | N121H | 4  | - | 5 | S228T | 1  | 1  | 1 |
| T56S | -  | 2  | 1  | N121I | 2  | - | - | S231T | -  | -  | - |
| T56T | 5  | 13 | 9  | N121K | 1  | 2 | - | S232P | 1  | 1  | - |
| P57P | -  | 5  | 6  | N121M | -  | 2 | - | S232S | 1  | -  | - |
| N58L | 1  | -  | -  | N121R | -  | - | 1 | K233N | 1  | -  | - |
| N58H | -  | -  | 1  | N121S | 1  | - | 1 | P234P | 5  | 3  | 1 |
| N58S | -  | -  | 2  | N121Y | 1  | 1 | 1 | K236R | 1  | -  | - |
| S59F | 2  | 18 | 6  | A122A | 8  | 4 | 5 | S238S | -  | 1  | 1 |
| S59S | 2  | 3  | 3  | A122G | -  | 2 | - | Y240F | 2  | -  | - |
| R60K | 14 | 29 | 18 | D123A | -  | - | 1 | L241F | 2  | 2  | - |
| R60I | -  | -  | 1  | D123D | 3  | - | 5 | L242* | 2  | -  | - |

|      |   |    |   |       |    |   |   |       |   |   |    |
|------|---|----|---|-------|----|---|---|-------|---|---|----|
| K61N | - | 1  | - | F124L | 1  | - | - | D243D | - | - | 1  |
| S62C | - | 1  | - | K124* | -  | 1 | - | Q244R | 1 | - | -  |
| S62N | - | 1  | - | K124K | -  | 2 | - | N246D | 5 | - | -  |
| D63F | - | 1  | - | K124R | 2  | - | 1 | N246I | 6 | 2 | 2  |
| D63G | - | 1  | - | G125G | 1  | - | - | Y247C | 1 | - | -  |
| D63V | 1 | 9  | 2 | G125V | 1  | - | - | Y247F | 4 | 3 | 1  |
| L64F | - | 6  | 5 | L127L | 5  | 3 | - | Y247L | - | - | 1  |
| K66* | - | 1  | 2 | L127P | -  | 1 | - | E248E | - | 1 | -  |
| S68F | - | -  | 1 | L127Q | 1  | - | - | E248G | 7 | 2 | 2  |
| S68L | - | -  | 1 | S128N | -  | 2 | - | E249G | 6 | - | 1  |
| S68P | 1 | 1  | 2 | S128S | -  | - | 1 | I251L | 7 | 7 | 1  |
| S69P | 1 | -  | - | S128T | 1  | - | - | K252Q | 1 | - | -  |
| S69S | - | 1  | 3 | F130T | -  | 1 | - | K253N | 2 | 2 | 2  |
| V70F | 1 | -  | 1 | K131* | -  | 2 | - | Y254F | 2 | 1 | -  |
| V70I | - | -  | 3 | K131I | 2  | - | - | Y254L | - | - | 1  |
| V70V | 3 | -  | - | K131K | 1  | 1 | - | Y254N | 1 | - | -  |
| E71K | - | -  | 1 | K131Q | 1  | - | - | K255G | - | - | 1  |
| N72I | 1 | -  | - | K131R | -  | - | 1 | K255K | 1 | 1 | 2  |
| N72K | 1 | 4  | 3 | E132G | -  | 1 | - | K255R | 8 | 7 | 5  |
| N73A | 1 | -  | - | N133H | 1  | - | 1 | G256G | 1 | 1 | 2  |
| N73I | 1 | -  | - | T134A | -  | - | 1 | N257D | 3 | 4 | -  |
| N73K | 1 | 2  | 2 | T134K | 1  | - | 1 | N257E | 3 | 2 | 4  |
| N73N | 1 | -  | - | T134P | 1  | 4 | 2 | N257K | 2 | 1 | 1  |
| N74I | 1 | 2  | - | T134T | 3  | 4 | 3 | E258G | - | 1 | 1  |
| N74K | 1 | 6  | 5 | P135P | 4  | 2 | - | E258K | 2 | 2 | -  |
| N74R | - | -  | 1 | S136P | 1  | 1 | - | F260F | 9 | 4 | 12 |
| N74S | - | 2  | - | S136S | -  | 2 | - | D261  | - | - | 1  |
| D75E | 3 | 3  | 4 | N137D | 2  | - | - | H262L | 1 | - | -  |
| D75G | - | 3  | 3 | N137H | 4  | - | 2 | H262Q | 1 | - | -  |
| D75V | - | 2  | - | N137K | 1  | - | 1 | A263A | 1 | 1 | -  |
| D76A | - | 1  | - | N137Y | 1  | - | - | A264V | 1 | - | -  |
| D76P | 1 | -  | - | N138F | -  | 1 | - | Y265Y | 8 | 8 | 5  |
| Y77C | - | -  | 1 | N138I | 6  | - | - | D266D | 8 | 8 | 6  |
| Y77H | - | -  | 1 | H141H | 4  | - | - | W267G | 1 | - | -  |
| Y77N | 2 | 3  | 3 | H141L | 1  | - | - | R268K | 1 | - | 1  |
| Y77P | 1 | -  | - | H141Q | 5  | 3 | - | L269* | 1 | 1 | 2  |
| I78* | 1 | -  | - | N142K | 13 | 3 | 1 | L269I | 1 | - | -  |
| I78I | - | -  | 1 | K143K | -  | 1 | - | H270H | 8 | 6 | 3  |
| I78L | 3 | 2  | 1 | K143R | 1  | - | - | H270P | - | 1 | 2  |
| I79I | - | 1  | - | K143T | 1  | - | - | H270Q | 1 | - | -  |
| I79K | 6 | 16 | 7 | D144E | -  | 1 | - | S271R | 2 | 2 | -  |
| I79L | 1 | -  | - | D144N | 1  | - | - | G272G | 1 | 2 | 1  |
| I79V | - | 1  | - | Y145H | 1  | - | - | V273E | 1 | - | -  |

|      |   |   |   |       |    |   |    |       |   |   |   |
|------|---|---|---|-------|----|---|----|-------|---|---|---|
| N80C | - | - | 1 | Y145N | 2  | 1 | -  | T274T | - | - | 1 |
| N80D | - | - | 1 | F146L | 1  | - | -  | D278D | - | - | 1 |
| N80K | 1 | 1 | 3 | I147I | -  | 1 | -  | C282W | 4 | 5 | 1 |
| S81A | - | - | 1 | I147K | 7  | 2 | 1  | C285G | 1 | 4 | - |
| S81N | - | - | 1 | N148I | -  | 1 | -  | W286G | - | 1 | - |
| S81S | 1 | - | - | F150* | 1  | - | -  | F288L | - | 1 | 1 |
| S81T | - | 1 | 1 | D151D | 1  | - | -  | S289R | - | 1 | 1 |
| L82V | - | 1 | - | D151E | 57 | 8 | 19 | S290K | - | - | 1 |
| L82W | - | 2 | 3 | N152K | 12 | 2 | 2  | S290N | 1 | - | - |
| L83L | - | 1 | - | F154F | 1  | - | 1  | S290R | - | 1 | - |
| L83P | - | 1 | 1 | L155* | 2  | 1 | -  | I291K | 1 | 5 | 3 |
| L83R | - | 4 | 1 | L155I | -  | - | 1  | G292S | 1 | - | - |
| L83V | - | - | 3 | L155L | 1  | 1 | 1  | S293P | - | 1 | - |
| K84K | 1 | 1 | - | L155S | 1  | - | -  | V294E | - | 1 | 1 |
| K84Q | 1 | - | - | L155W | 1  | - | -  | E295K | 1 | 2 | 2 |
| S85C | - | - | 1 | M156I | 1  | - | -  | S296P | - | - | 1 |
| S85T | - | - | 1 | M156K | 2  | - | 1  | S296S | 1 | 2 | 2 |
| P86L | - | 1 | - | M156R | 3  | - | -  | R301G | - | - | - |
| P86P | 1 | 2 | 5 | M156V | 2  | - | -  | R301K | - | - | - |
| N87K | 6 | 9 | 4 | N157H | 1  | - | -  | R301R | 1 | 1 | 1 |
| N87S | - | 2 | - | N158K | 8  | 1 | 2  | N303I | - | 1 | - |
| G88G | 1 | 1 | - | N158S | 2  | 1 | 3  | L308F | - | 1 | - |
| K89K | 1 | 1 | 1 | A159A | -  | - | 1  | E310G | - | 1 | - |
| K89R | - | 1 | 1 | A159G | 1  | 2 | 1  |       |   |   |   |



**Supplementary Table 3 Novel and known *pfcoronin* mutations observed in all the Ghanaian isolates analyzed.**

| Mutation    | Ecological zones/n |          |           | Mutation | Ecological zones/n |    |    |
|-------------|--------------------|----------|-----------|----------|--------------------|----|----|
|             | CS                 | FZ       | GS        |          | CS                 | FZ | GS |
| W45G        | -                  | 1        | -         | L90*     | 1                  | -  | -  |
| V47V        | 2                  | -        | 1         | A91A     | -                  | -  | 1  |
| E48E        | -                  | -        | 1         | S92*     | 1                  | -  | -  |
| M52I        | -                  | -        | 1         | E95G     | 1                  | -  | -  |
| I53M        | -                  | -        | 1         | M97K     | -                  | -  | 1  |
| I56N        | -                  | -        | 1         | R100R    | 1                  | -  | -  |
| L58K        | -                  | -        | 1         | I101K    | -                  | -  | 1  |
| L58*        | -                  | -        | 1         | I101R    | -                  | -  | 1  |
| V62L        | -                  | -        | 1         | I104R    | 1                  | -  | -  |
| N64S        | 1                  | 1        | -         | I104T    | -                  | -  | 1  |
| V67A        | -                  | -        | 1         | R105C    | -                  | -  | 1  |
| I68T        | -                  | -        | 1         | H106Q    | -                  | -  | 1  |
| L70M        | -                  | -        | 1         | D108E    | -                  | -  | 2  |
| H73Q        | -                  | -        | 1         | E109E    | -                  | -  | 1  |
| T74T        | 2                  | 2        | 4         | V111E    | -                  | -  | 1  |
| S75C        | -                  | -        | 1         | N112K    | -                  | -  | 1  |
| <b>P76S</b> | <b>6</b>           | <b>2</b> | <b>14</b> | P117P    | -                  | -  | 1  |
| I77V        | -                  | 1        | 1         | C119R    | -                  | -  | 1  |
| L78P        | -                  | -        | 1         | I120V    | 1                  | -  | -  |
| D79K        | -                  | -        | 1         | I120K    | -                  | -  | 1  |
| D79V        | -                  | -        | 1         | N122K    | -                  | -  | 1  |
| L80C        | -                  | 1        | -         | N122N    | -                  | -  | 1  |
| L80M        | -                  | -        | 1         | K126K    | 1                  | -  | 1  |
| S81*        | 1                  | -        | -         | V128E    | -                  | -  | 1  |
| N83D        | -                  | 1        | -         | N129K    | -                  | -  | 1  |
| Y86D        | -                  | 1        | -         | L131L    | -                  | -  | 1  |
| Y86K        | -                  | -        | 1         | M136V    | -                  | -  | 1  |
| I89K        | -                  | -        | 1         | S143S    | -                  | -  | 1  |

**Supplementary Table 4 Novel and known *pfarps10* mutations observed in all samples analysed**

| Mutation     | Ecological zones/n |    |          | Mutation | Ecological zones/n |    |    |
|--------------|--------------------|----|----------|----------|--------------------|----|----|
|              | CS                 | FZ | GS       |          | CS                 | FZ | GS |
| H126W        | 1                  | -  | -        | S131X    | 1                  | -  | -  |
| H126R        | 1                  | -  | -        | S131E    | 1                  | -  | -  |
| H126M        | -                  | 2  | 3        | S131V    | 1                  | 1  | -  |
| H126C        | -                  | 1  | -        | S131*    | 1                  | -  | 1  |
| H126L        | -                  | -  | 2        | S131N    | -                  | 2  | 2  |
| V127W        | 1                  | 3  | 2        | R132*    | 1                  | -  | -  |
| <b>V127M</b> | -                  | -  | <b>1</b> | R132S    | 1                  | -  | -  |
| V127D        | 1                  | -  | -        | R132A    | 1                  | 1  | -  |
| V127G        | -                  | 1  | 1        | R132K    | 1                  | 1  | 1  |
| V127C        | -                  | 1  | 1        | E133R    | 1                  | -  | -  |
| V127*        | -                  | -  | 1        | E133N    | 1                  | -  | -  |
| D128I        | 1                  | 1  | 2        | E133S    | 1                  | -  | 1  |
| D128K        | 1                  | -  | 1        | Q134X    | 1                  | 1  | -  |
| D128N        | 2                  | 1  | -        | Q134A    | 1                  | -  | -  |
| D128G        | -                  | 1  | -        | Q134P    | 1                  | -  | -  |
| K129K        | 1                  | -  | 2        | Q134H    | 1                  | -  | -  |
| K129T        | 1                  | -  | -        | Q134N    | 1                  | -  | 1  |
| K129D        | 1                  | -  | 1        | F135R    | 1                  | -  | -  |
| K129*        | -                  | 2  | -        | F135S    | 1                  | -  | -  |
| K129M        | -                  | 1  | -        | E136N    | 1                  | -  | -  |
| D130T        | 2                  | 1  | -        | I137K    | 1                  | -  | -  |
| D130X        | 1                  | -  | -        | K138T    | 1                  | -  | -  |
| D130S        | 1                  | -  | 1        | Q139V    | 1                  | -  | -  |
| D130N        | -                  | -  | 2        | Y140T    | 1                  | -  | -  |

n: number of samples with the mutation, **bold**: known mutation

**Supplementary Table 5: Novel and known *pfid* mutations observed in all isolates analysed.**

| <b>Mutation</b> | <b>Ecological zones/n</b> |           |           |
|-----------------|---------------------------|-----------|-----------|
|                 | <b>CS</b>                 | <b>FZ</b> | <b>GS</b> |
| A145S           | -                         | -         | 1         |
| K146*           | -                         | -         | 1         |
| V148G           | 1                         | -         | 2         |
| E149K           | -                         | -         | 1         |
| V152V           | 1                         | -         | -         |
| D161Y           | -                         | -         | 1         |
| E162D           | -                         | -         | 1         |
| E163D           | -                         | -         | 1         |
| Q164H           | -                         | -         | 1         |
| T174T           | -                         | -         | 1         |
| P177P           | -                         | -         | 1         |
| V182V           | -                         | -         | 1         |
| K187N           | -                         | -         | 1         |
| D189H           | -                         | -         | 1         |
| M194V           | -                         | -         | 1         |

**Supplementary Table 6: Novel and known *pfmrp1* mutations observed in all isolates analysed.**

| Mutation | FZ | GS | CS | Mutation | FZ | GS | CS | Mutation | FZ | GS | CS |
|----------|----|----|----|----------|----|----|----|----------|----|----|----|
| C861K    | 1  | -  | -  | I884I    | -  | -  | 2  | N866T    | 1  | -  | -  |
| C894S    | -  | -  | 1  | I888K    | -  | -  | 1  | N866Y    | 14 | 4  | 13 |
| D864G    | 17 | 4  | 1- | I899F    | -  | -  | 1  | N867F    | 1  | -  | -  |
| D864M    | 1  | 1  | 1  | K886K    | 1  | -  | 4  | N891L    | -  | -  | 1  |
| D864S    | 1  | -  | -  | K887R    | -  | -  | 2  | S897I    | -  | -  | 1  |
| D864*    | 1  | -  | -  | K895L    | -  | -  | 1  | S885G    | 1  | -  | -  |
| D865*    | 16 | 4  | 11 | L862*    | 3  | -  | -  | S885K    | 3  | 5  | 3  |
| D865E    | -  | -  | 1  | L862G    | -  | 1  | -  | S885N    | 2  | -  | 2  |
| D865I    | 1  | -  | 1  | L862S    | 9  | 1  | 3  | S885P    | -  | -  | 2  |
| D865S    | -  | 1  | -  | L862V    | 2  | 2  | 2  | S885R    | -  | 1  | 3  |
| D865V    | -  | 1  | -  | L872*    | -  | -  | 1  | S885S    | -  | -  | 1  |
| D874D    | -  | -  | 1  | L88-F    | -  | -  | 1  | S885T    | 32 | 7  | 14 |
| D897E    | -  | -  | 1  | L88-V    | -  | -  | 1  | S89-C    | 1  | -  | -  |
| D917R    | -  | 1  | -  | L892L    | -  | -  | 1  | S89-P    | -  | -  | 1  |
| E896K    | -  | -  | 1  | M863G    | 1  | -  | -  | S9--P    | -  | -  | 1  |
| F868I    | 1  | -  | -  | M863R    | 1  | 1  | -  | T878T    | -  | -  | 1  |
| F877L    | -  | -  | 1  | M863W    | 4  | 1  | 2  | T878Y    | -  | -  | 1  |
| F901S    | -  | -  | 1  | M863Y    | 18 | 1  | 9  |          |    |    |    |
| I876V    | 2  | 4  | 2  | N866M    | 3  | 3  | 2  |          |    |    |    |

**Supplementary Table 7: Novel and known *pfmrp2* mutations observed in all isolates analysed.**

| Mutation | FZ | GS | CS | Mutation | FZ | GS | CS | Mutation | FZ | GS | CS |
|----------|----|----|----|----------|----|----|----|----------|----|----|----|
| N513H    | 1  | -  | -  | I568F    | -  | -  | 1  | D629N    | 2  | -  | -  |
| N514I    | 1  | -  | -  | I568L    | 1  | -  | -  | D630G    | 1  | -  | -  |
| N514S    | -  | 1  | -  | L572F    | 1  | -  | -  | D631G    | 5  | -  | 3  |
| N517M    | 1  | -  | -  | I573K    | -  | -  | 1  | D633N    | 3  | -  | -  |
| N518N    | 1  | -  | -  | E574K    | 2  | -  | -  | D635V    | 1  | -  | -  |
| I519I    | 1  | -  | -  | N577D    | -  | -  | 1  | Y636C    | 2  | -  | -  |
| S520S    | 1  | -  | -  | K580T    | 1  | -  | -  | D637N    | 2  | -  | -  |
| I523M    | 1  | -  | -  | K580S    | 1  | -  | -  | N641D    | 1  | -  | -  |
| V524G    | 1  | -  | -  | N583I    | 1  | -  | -  | N642T    | -  | -  | 1  |
| F529S    | 1  | -  | -  | K584R    | -  | -  | 1  | N642S    | 1  | -  | -  |
| F530S    | 1  | -  | -  | K584I    | -  | -  | 1  | N645D    | 6  | -  | 4  |
| Y532S    | 1  | -  | -  | N587H    | -  | -  | 1  | D647D    | 1  | -  | -  |
| I533L    | 3  | -  | -  | Y588*    | -  | -  | 1  | Y648F    | -  | -  | 1  |
| R534K    | 2  | -  | -  | Y589*    | -  | -  | 1  | D649N    | 1  | -  | 1  |
| K538K    | 1  | -  | -  | Y589I    | 1  | -  | -  | M652V    | 1  | -  | 1  |
| N540I    | 1  | -  | -  | N593S    | 1  | -  | -  | M657T    | 1  | -  | -  |
| N540S    | 1  | -  | -  | Y598F    | 1  | -  | -  | K672R    | -  | 1  | -  |
| S543G    | 1  | -  | -  | K600K    | 1  | -  | 1  | K681E    | 1  | -  | -  |
| S544T    | 2  | -  | 1  | L602V    | -  | 1  | -  | N686H    | 1  | -  | -  |
| S545R    | 1  | -  | -  | N604S    | 1  | -  | -  | N686Y    | 1  | -  | -  |
| S545C    | 1  | -  | -  | M605V    | -  | -  | 1  | Q694H    | 2  | -  | -  |
| S547S    | -  | 1  | -  | K606E    | -  | -  | 1  | L699L    | 1  | -  | -  |
| L548F    | 1  | -  | -  | S607G    | 1  | -  | -  | H703L    | 1  | -  | -  |
| I549T    | 1  | -  | -  | N609K    | 1  | -  | -  | K704H    | 1  | -  | -  |
| T550P    | 2  | -  | -  | T610T    | 1  | -  | -  | T706A    | 1  | -  | -  |
| T550T    | 1  | -  | -  | C611C    | -  | -  | 1  | K714I    | 5  | -  | 2  |
| Y555Y    | 1  | -  | -  | C611G    | 1  | -  | -  | K715Q    | 1  | -  | -  |
| K556N    | 1  | -  | -  | F613V    | -  | -  | 1  | N719D    | 1  | -  | -  |
| K556T    | 1  | -  | -  | Q614L    | 1  | -  | -  | K723E    | 1  | -  | -  |
| L558F    | 1  | -  | -  | N615K    | -  | -  | 1  | K743I    | 1  | -  | -  |
| I559S    | 1  | -  | -  | N617P    | -  | -  | 1  | K776R    | 1  | -  | -  |
| V562G    | 1  | -  | -  | N617D    | 1  | -  | -  | N783H    | 1  | -  | -  |
| V562V    | 1  | -  | -  | N619T    | -  | -  | 1  | G794R    | 1  | -  | -  |
| V562A    | 1  | -  | -  | N619P    | -  | -  | 1  | F801I    | 1  | -  | -  |
| N563D    | -  | -  | 1  | N620S    | 1  | -  | -  | Y802N    | 1  | -  | -  |
| N563H    | 1  | -  | -  | N622S    | 2  | -  | -  | L805L    | 1  | -  | -  |
| N563Y    | -  | 1  | 1  | G623D    | 1  | -  | -  | G806R    | 1  | -  | -  |
| N564Y    | 1  | -  | -  | Y624C    | 1  | -  | -  | L811*    | 1  | -  | -  |
| P566P    | -  | -  | 3  | D625Y    | -  | -  | 1  |          |    |    |    |
| N567H    | -  | -  | 1  | D627G    | -  | 1  | 1  |          |    |    |    |

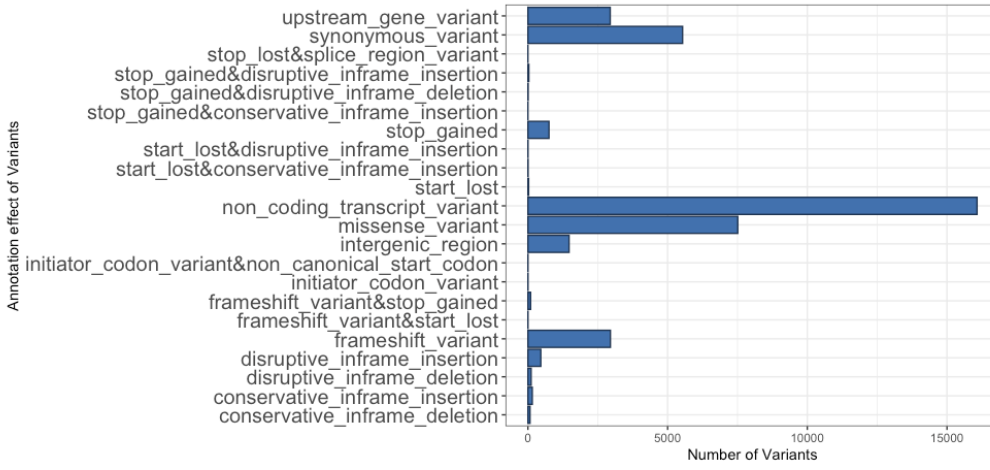

**Supplementary Figure 1:** Distribution of annotation effects of all genetic variants observed in *pffp2* in Ghanaian isolates.
